# Supplementary material for: Designing a lysosome targeting nanomedicine for pH-triggered enhanced phototheranostics
Source: Royal Society of Chemistry journal article supplement (doi:10.1039/d0qm01016b), 2021-01-01
Supplement: d0qm01016b1.pdf [file d0qm01016b1.pdf]

## Designing a lysosome targeting nanomedicine for pH triggered enhanced phototheranostics

Dengfeng Zou<sup>a†</sup>, Aolin Zhang<sup>b†</sup>, Zhiqiang Chen<sup>a</sup>, Jianjiao Chen<sup>a</sup>, Jun Deng<sup>c\*</sup>, Gang Li<sup>d</sup>, Shunlin Zhang<sup>d</sup>, Zhe Feng<sup>d</sup>, Jingfei Feng<sup>a</sup>, Jie Yang<sup>bd\*</sup>

a. School of Pharmacy, Guilin Medical University, Guilin, 541004, Guangxi, P.R. China.

b. Jiangsu Laboratory of Advanced Materials, Department of Materials Engineering, Changshu Institute of Technology, Changshu, 215500, Jiangsu, P.R. China.

E-mail: [jieyang@csit.edu.cn](mailto:jieyang@csit.edu.cn)

c. Department of thoracic surgery, Kunshan Hospital Affiliated to Jiangsu University, Kunshan, 215300, P.R. China. Email: [zhaojia20200327@126.com](mailto:zhaojia20200327@126.com)

d. College of Chemical Engineering, State Key Laboratory of Materials Oriented Chemical Engineering, Nanjing Tech University, Nanjing, 210000, Jiangsu, P.R. China.

†: These authors contribute equally

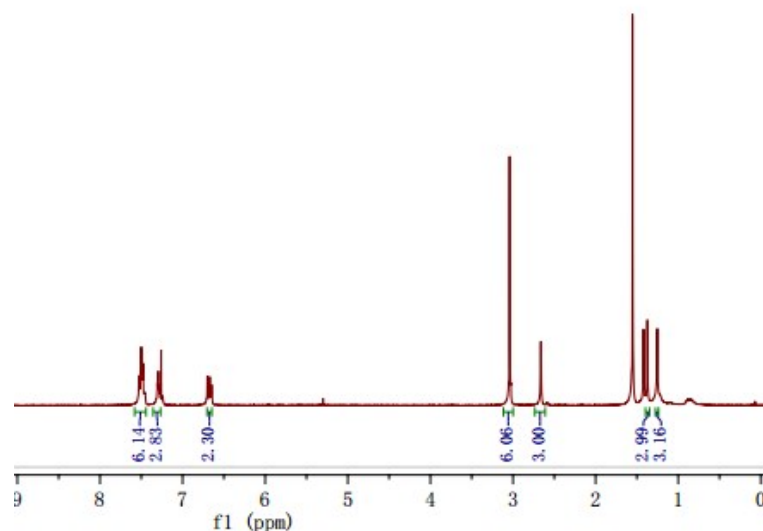

Figure S1 <sup>1</sup>H NMR spectrum of **BDPIN** in CDCl<sub>3</sub> at room temperature.

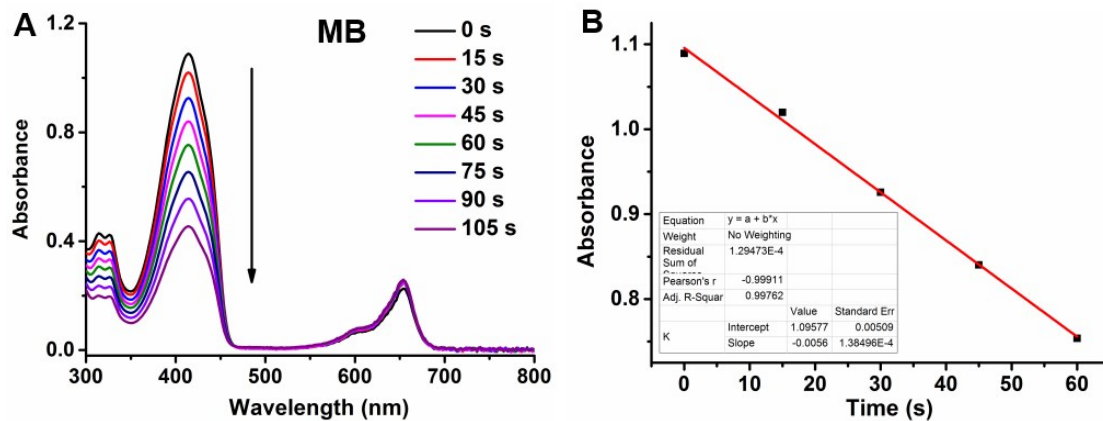

Figure S2 (a) Degradation of DPBF in the presence of MB with irradiation; (b) Linear fitting of the degradation of the absorbance.

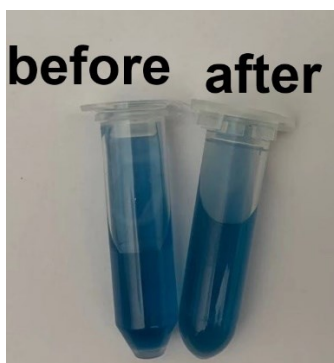

Figure S3 Picture of **BDPIN** NPs before and after irradiation.

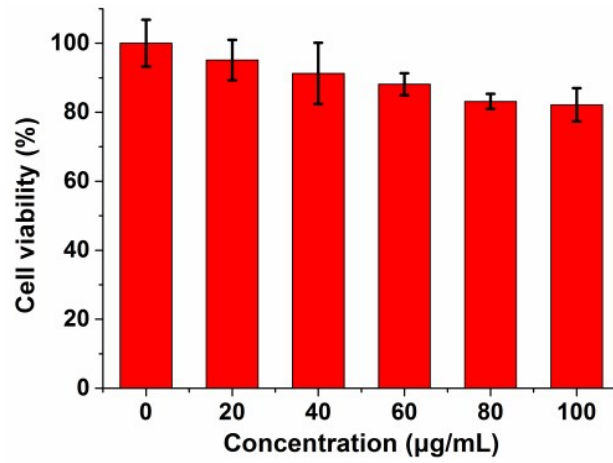

Figure S4 Cell viability of HeLa cells incubated with **BDPIN** NPs under high concentrations without laser irradiation.

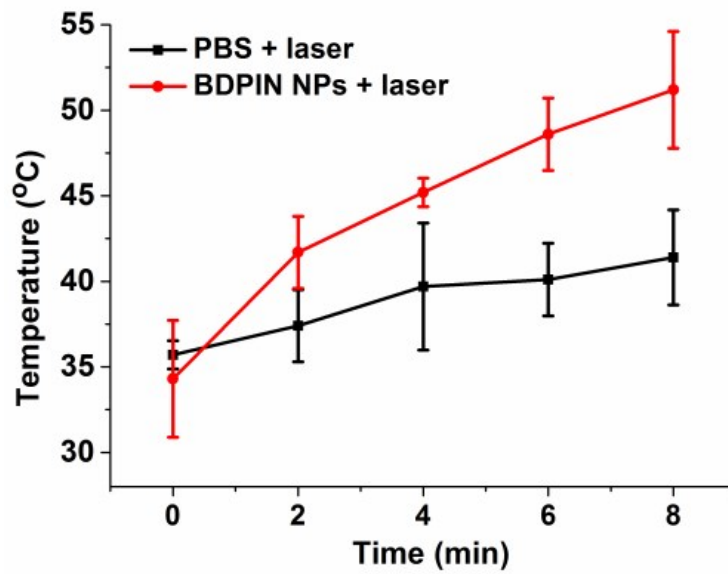

Figure S5 Tumor temperature change of PBS and **BDPIN** NPs groups with laser irradiation.
